# Supplementary material for: Kinetic Monte Carlo simulations of the assembly of filamentous biomacromolecules by the dimer addition mechanism
Source: Royal Society of Chemistry journal article supplement (doi:10.1039/c4ra09189b), 2014-12-05
Supplement: c4ra09189b1.pdf [file c4ra09189b1.pdf]

**Kinetic Monte Carlo simulations of the assembly of filamentous  
biomacromolecules by dimer addition mechanism**

Tianzhi Luo <sup>\*,a</sup> and Douglas N. Robinson <sup>\*,a</sup>

<sup>a</sup> Department of Cell Biology, School of Medicine, Johns Hopkins University, Baltimore, MD,  
21205, USA

\* Authors to whom correspondence should be addressed. Email: tzluo@jhu.edu and dnr@jhmi.edu

**Supplementary Materials**

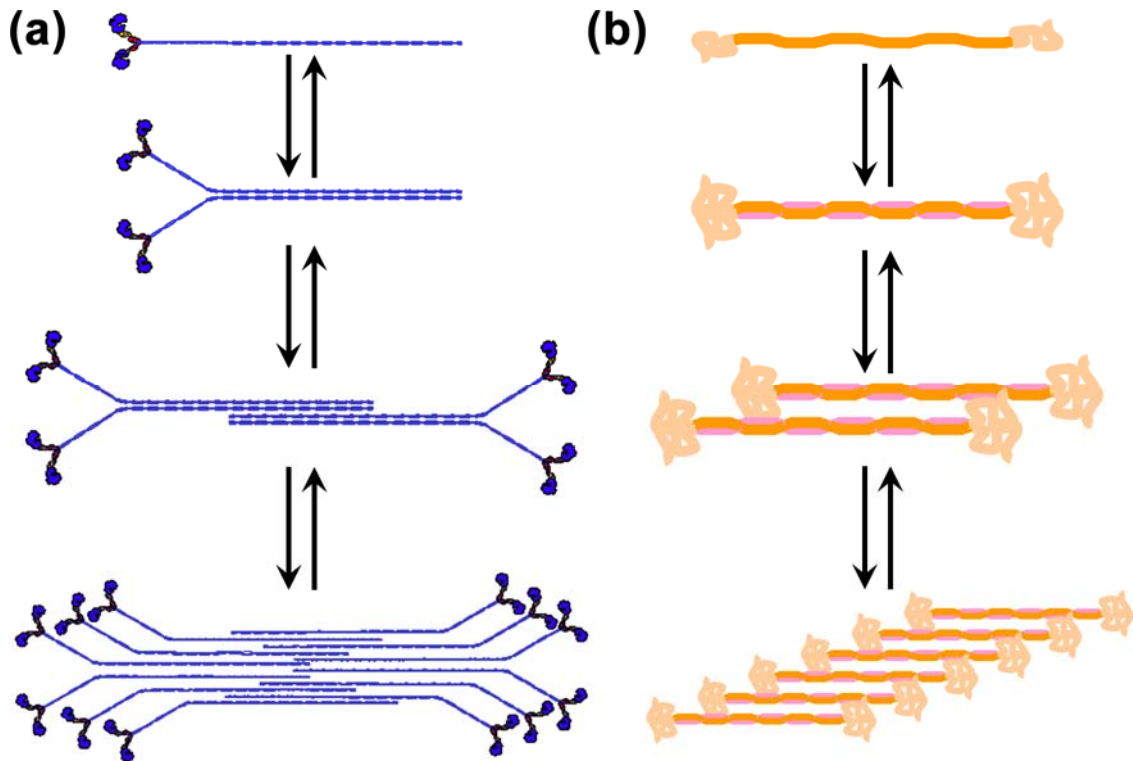

**Figure S1.** The schematic graph of the assembly of myosin II thick filaments (a) and intermediate filaments (b) through dimer addition, respectively. After the formation of dimer, further assembly proceeds by adding dimer to existing oligomers.

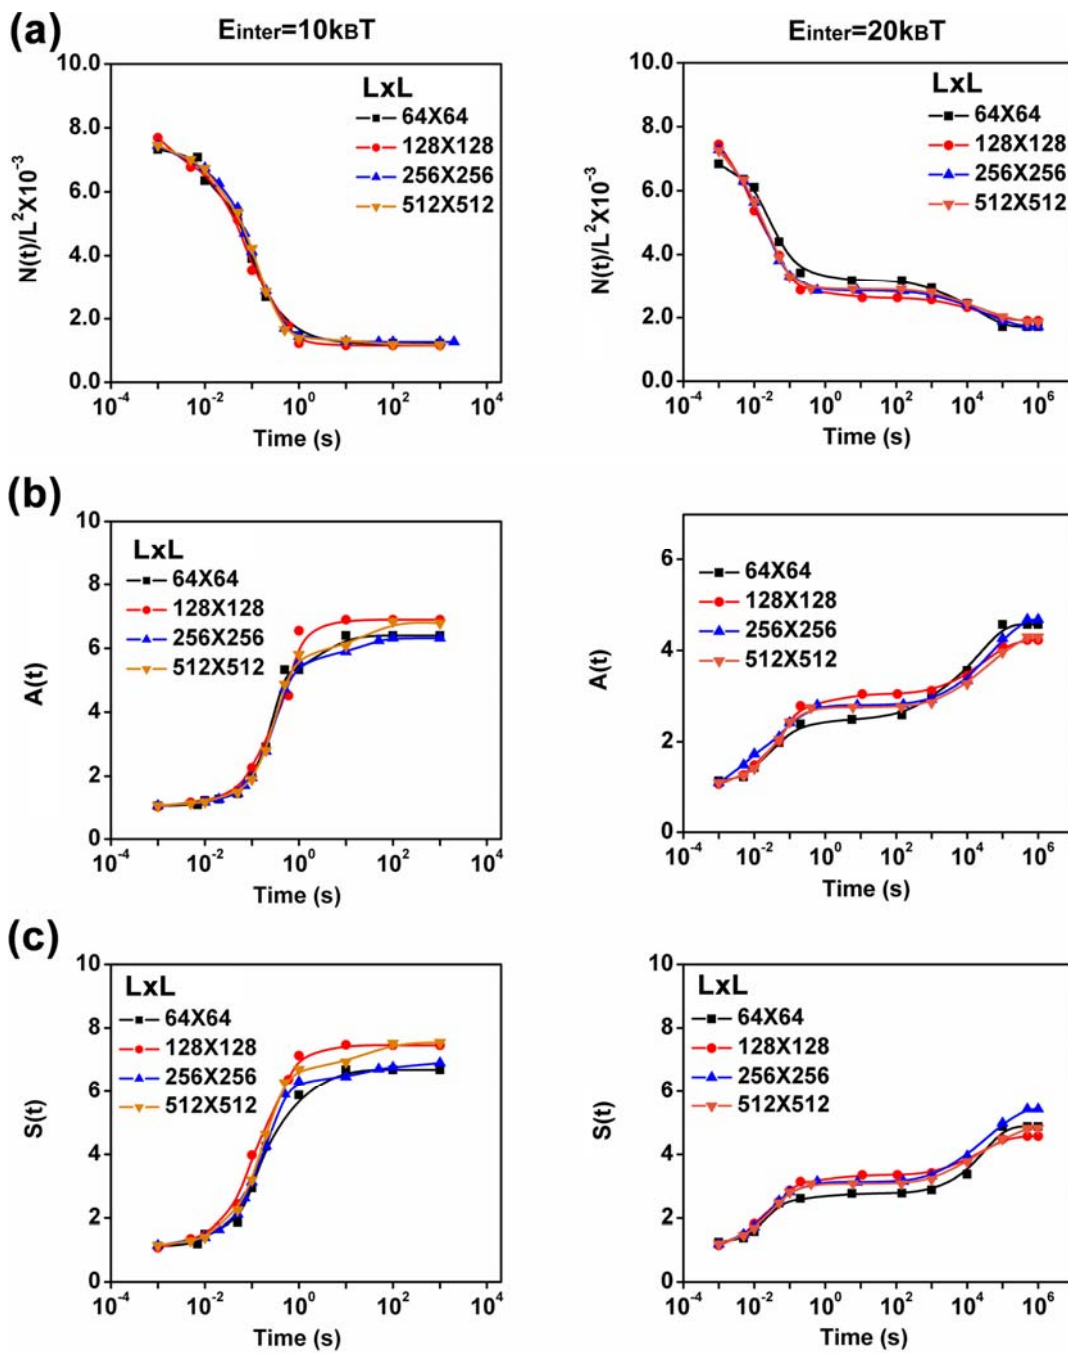

**Figure S2.** The effect of size of simulation window  $L \times L$  on the cluster density (a), the number average cluster size (b) and the weight average cluster size (c) is small. Here  $L$  has different values of 64, 128, 256 and 512.

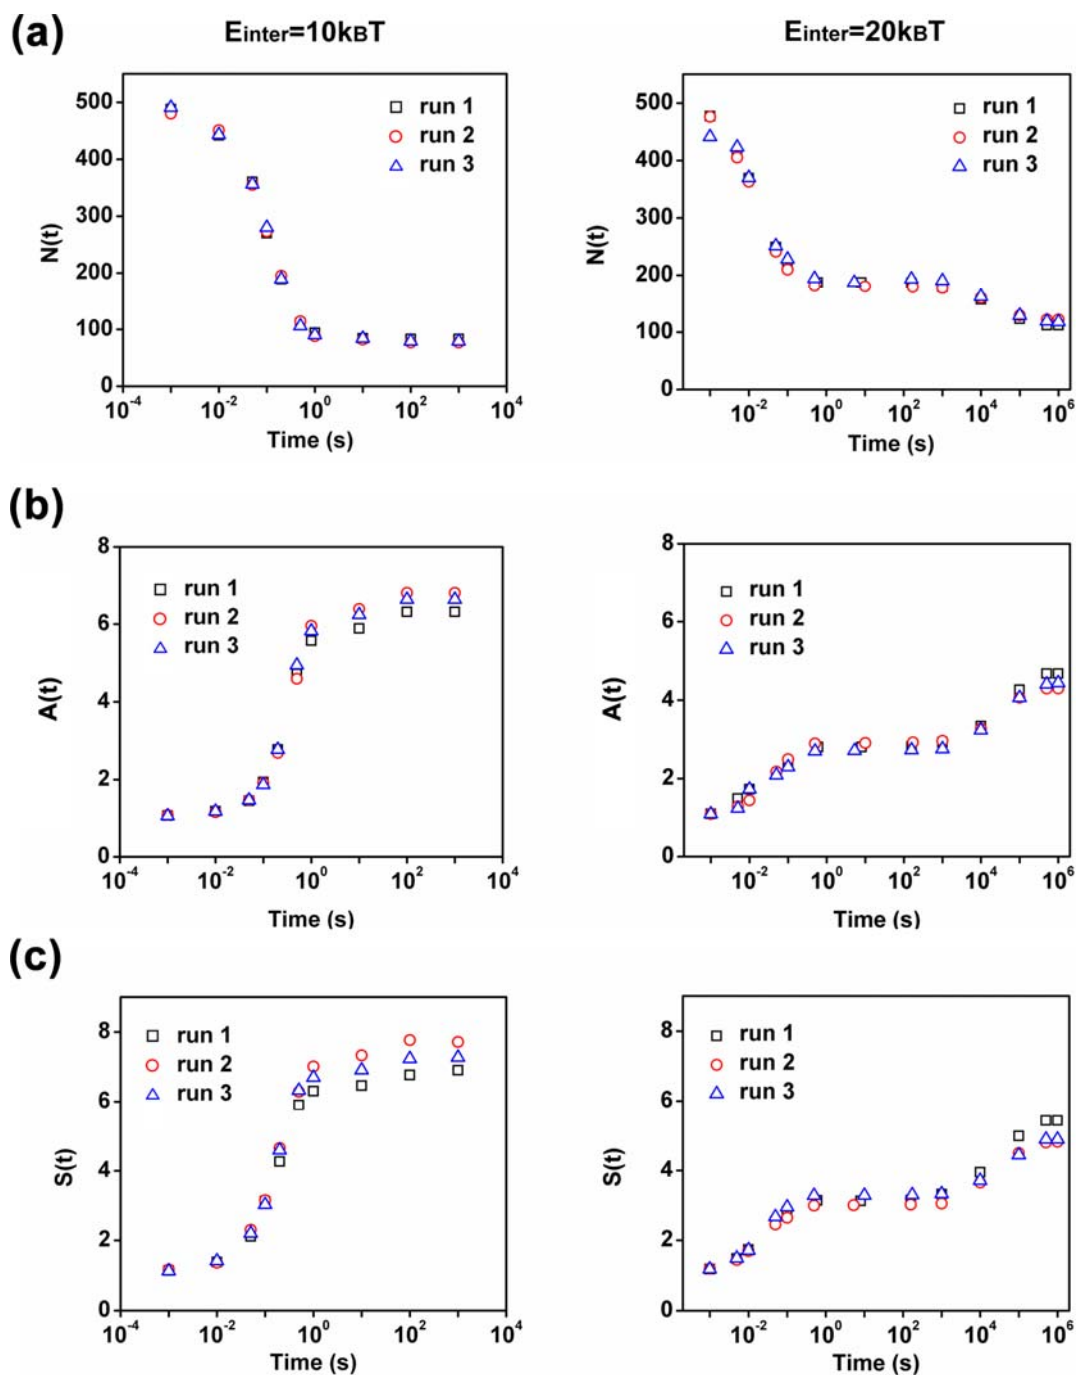

**Figure S3.** The effect of random seeding on the aggregation of dimmers is negligible. The evolutions of the number of clusters  $N(t)$ , number average cluster size  $A(t)$  and weight average cluster size  $S(t)$  are shown in (a), (b) and (c), respectively.

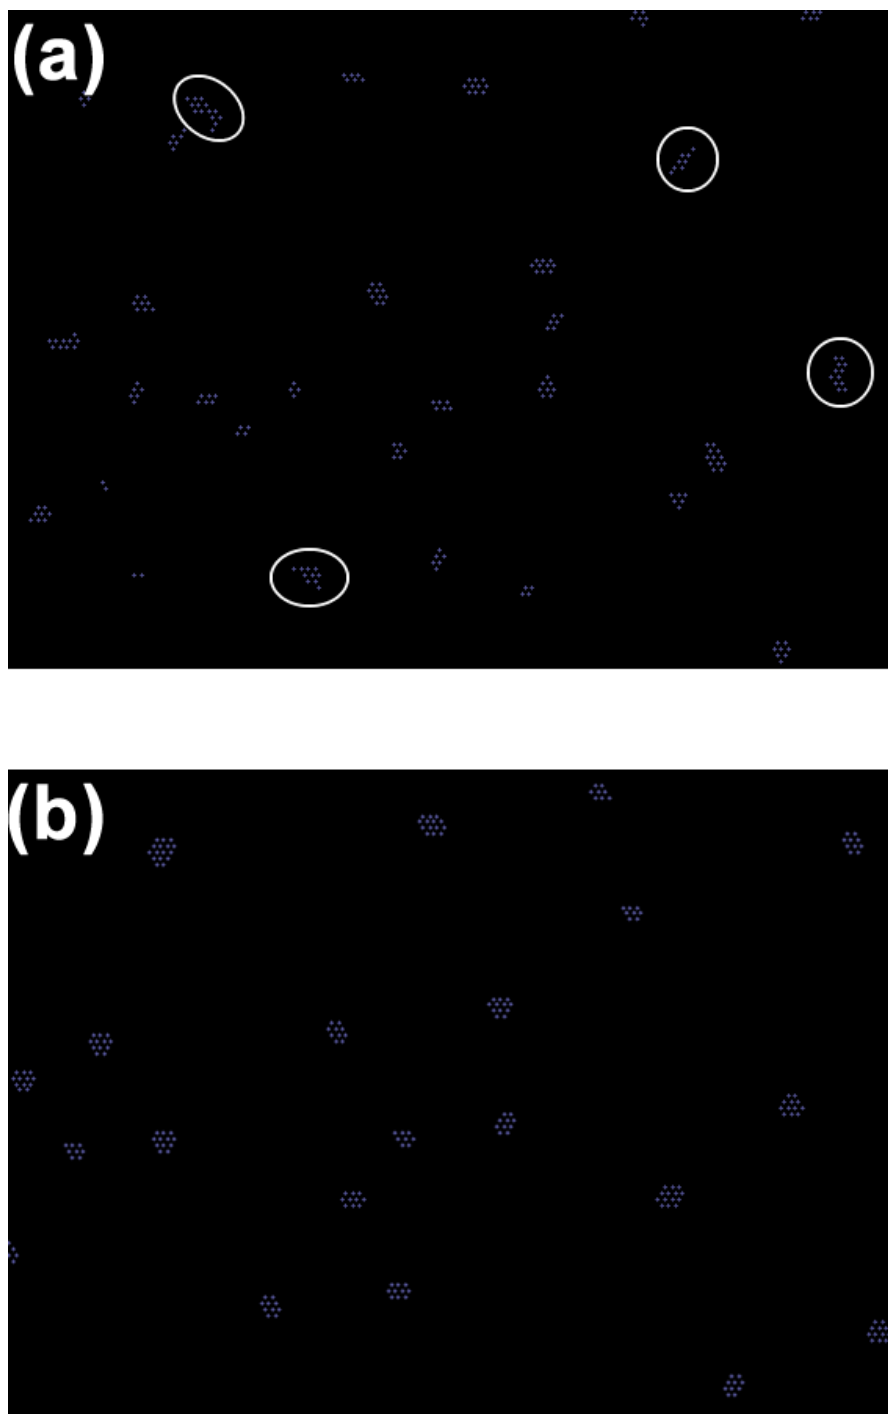

**Figure S4.** Snapshots of the configurations of oligomers in the intermediate plateau (a) and the steady-state (b) of a double-S shape aggregation where  $E_{\text{inter}}=10 \text{ k}_B T$ ,  $\Gamma_{\text{off}}=10^6 \text{ Hz}$ ,  $r_{\text{diff}}^{\text{mono}}=1.0 \mu\text{m}^2/\text{s}$  and  $\varphi=0.016$ . The unstable (uncompact) clusters in the intermediate plateau are labeled with white circles. Only a small part of the simulation window is shown here.

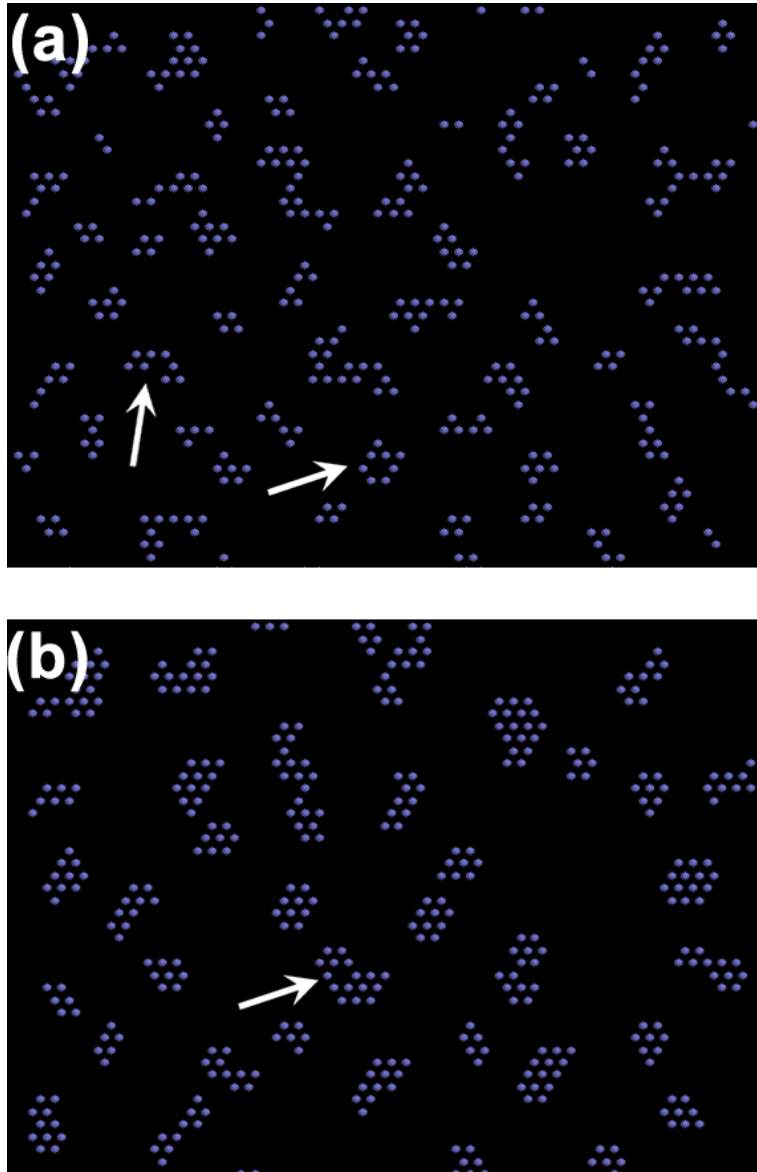

**Figure S5.** The configurations of oligomers in early (a) and later (b) stages of aggregations where  $\Gamma_{off} = 10^6$  Hz,  $E_{inter} = 10$  k<sub>B</sub>T,  $r_{diff}^{mono} = 0.1$   $\mu\text{m}^2/\text{s}$  and  $\varphi = 0.16$ . By comparison, oligomers are more compacted in late stage. Only a small part of the simulation window is shown here.

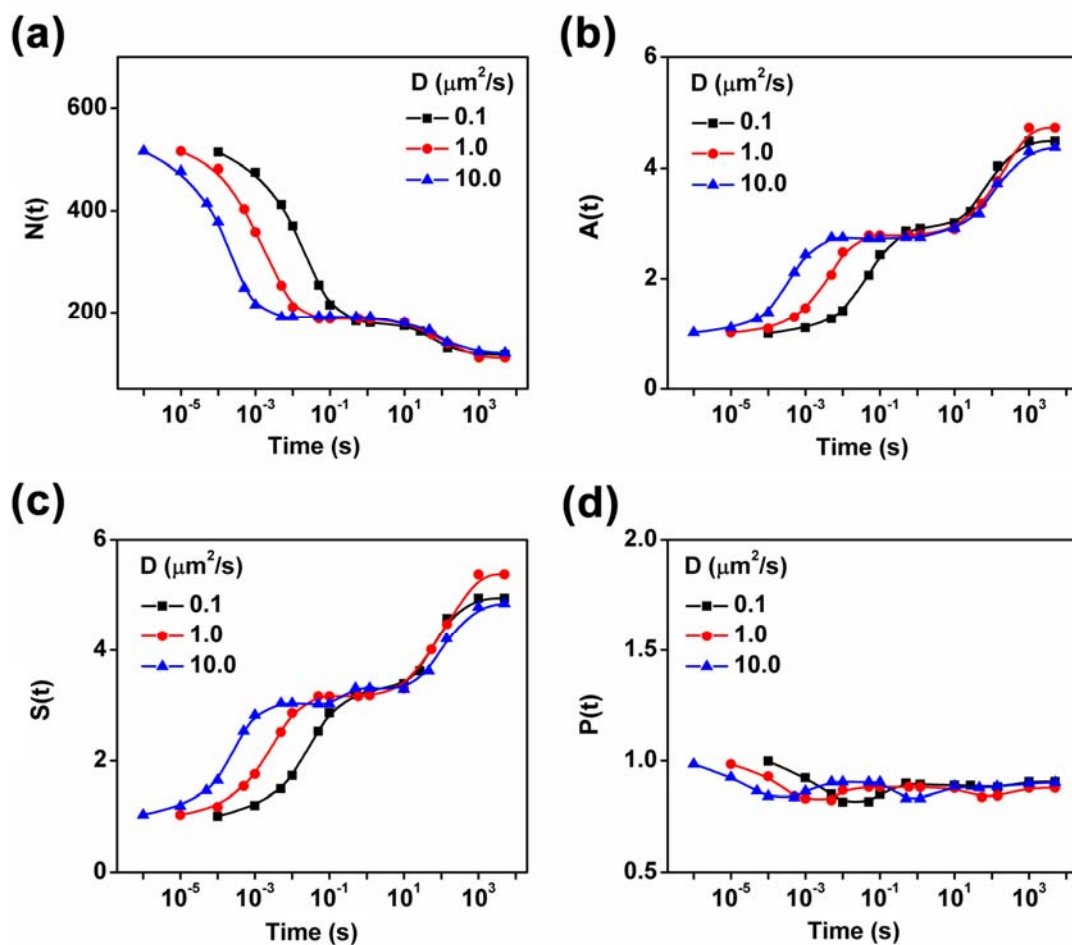

**Figure S6.** The aggregation kinetics with different diffusion coefficients at  $r_{diff}^{mono} = 0.1 \mu\text{m}^2/\text{s}$ ,  $\Gamma_{off} = 10^4 \text{ Hz}$  and  $\varphi = 0.016$ .

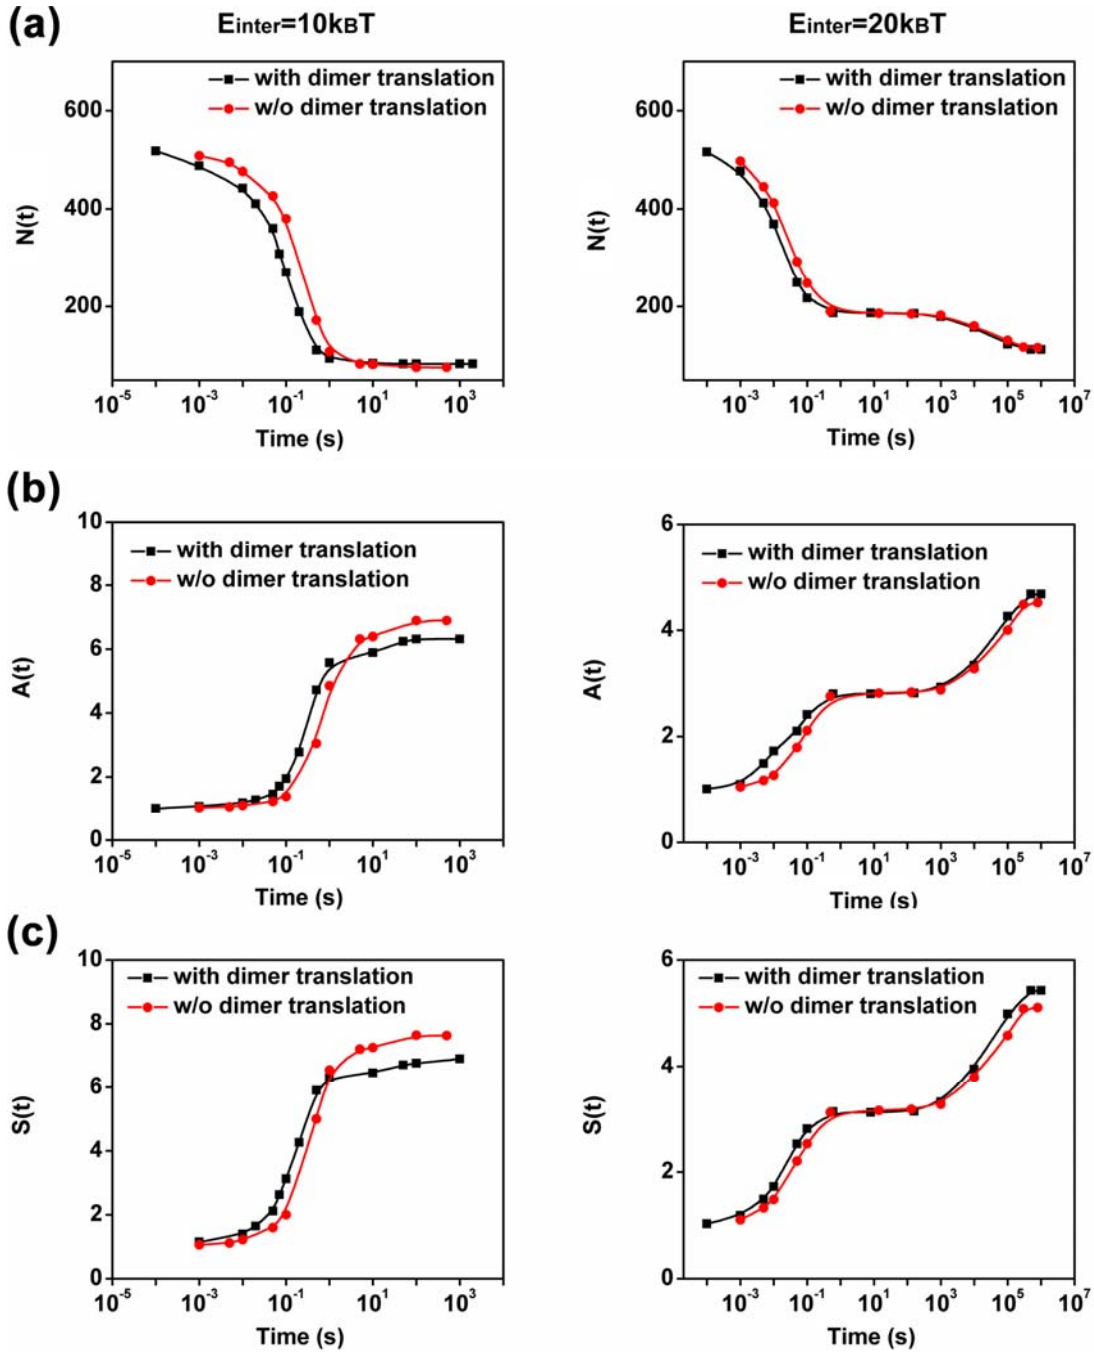

**Figure S7.** The effect of translation motion of dimers on the aggregation kinetics at  $r_{diff}^{mono} = 0.1 \mu m^2/s$ ,  $\Gamma_{off} = 10^6$  Hz and  $\varphi = 0.016$ .



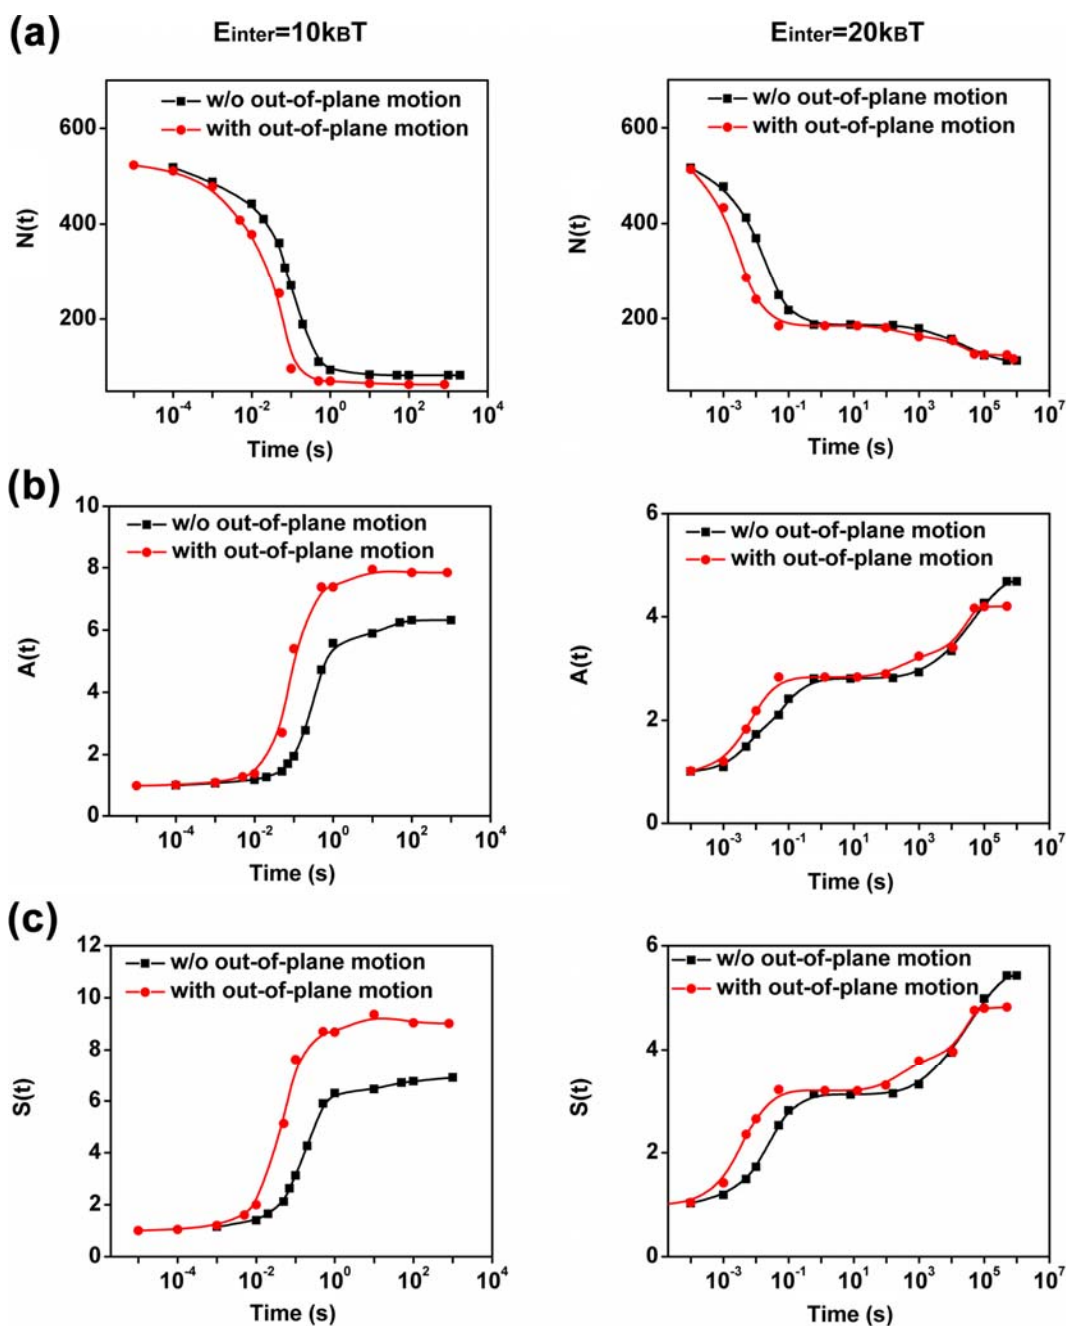

**Figure S8.** The effect of out-of-plane motion of dimers on the aggregation kinetics. Here, the rates of the out-of-plane motion (in and out) are 10 times of  $r_{diff}^{mono}$ . Other parameters are  $r_{diff}^{mono} = 0.1 \mu m^2/s$ ,  $\Gamma_{off} = 10^6$  Hz and  $\varphi = 0.016$ .
